# Supplementary material for: Association of Crohn’s disease-related chromosome 1q32 with ankylosing spondylitis is independent of bowel symptoms and faecal calprotectin
Source: PeerJ. 2018 Jun 26;6:e5088. doi: 10.7717/peerj.5088 (PMC6025147; doi:10.7717/peerj.5088)
Supplement: Supplemental Information 1 [file peerj-06-5088-s001.xlsx]

## Sheet: Sheet1
SAMPLE	DISQ Score	Calprotectin	JAK2_rs10758669		KIF21B_rs11584383		CDKAL1_rs6908425		IL12B_rs10045431		ZPBP2_rs2872507		MUC19_LRRK2_rs11175593		STAT3_rs744166		IL23R_rs1343151		IL23R_rs10489630		IL23R_rs11209026
			allele 1	allele 2	allele 1	allele 2	allele 1	allele 2	allele 1	allele 2	allele 1	allele 2	allele 1	allele 2	allele 1	allele 2	allele 1	allele 2	allele 1	allele 2	allele 1	allele 2
patient 1	0	0	A	A	T	T	C	C	C	C	A	G	C	C	C	T	C	T	G	T	A	G
patient 2	1	0	A	C	T	T	C	T	C	C	G	G	C	C	C	C	C	T	G	T	G	G
patient 3	2	0	A	A	C	T	C	C	A	C	A	G	C	C	T	T	C	T	G	T	G	G
patient 4	2	0	A	A	T	T	C	T	A	C	G	G	C	C	T	T	C	T	T	T	G	G
patient 5	2	0	A	C	T	T	C	T	C	C	G	G	C	C	C	T	C	C	G	T	G	G
patient 6	3	0	A	C	C	T	C	C	A	C	A	G	C	C	T	T	T	T	T	T	G	G
patient 7	3	0	A	C	T	T	C	C	C	C	A	G	C	C	C	C	C	C	G	T	G	G
patient 8	3	0	A	C	C	T	C	C	A	A	A	A	C	C	T	T	C	T	G	T	G	G
patient 9	4	0	A	A	T	T	C	T	C	C	G	G	C	C	C	T	C	T	T	T	G	G
patient 10	4	0	A	A	T	T	C	C	A	C	A	G	C	C	C	T	C	C	T	T	G	G
patient 11	5	0	A	C	C	T	C	C	A	C	G	G	C	C	T	T	C	C	G	T	G	G
patient 12	6	0	A	C	C	C	C	C	C	C	A	G	C	C	C	C	C	C	T	T	G	G
patient 13	6	0	A	A	C	T	C	C	A	C	A	A	C	C	C	T	C	T	G	G	G	G
patient 14	7	0	A	A	C	T	C	C	C	C	A	G	C	C	C	T	C	T	T	T	A	G
patient 15	7	0	A	C	C	T	C	T	A	C	A	A	C	C	C	T	C	C	T	T	G	G
patient 16	9	0	A	A	C	T	C	C	A	C	G	G	C	C	T	T	C	T	G	T	G	G
patient 17	11	0	C	C	T	T	C	T	C	C	A	G	C	C	C	T	C	T	G	T	G	G
patient 18	11	0	C	C	T	T	C	T	A	C	A	G	C	C	C	T	C	C	G	T	G	G
patient 19	12	0	A	C	T	T	C	C	C	C	A	A	C	C	C	T	C	C	T	T	G	G
patient 20	12	0	A	C	C	T	C	T	C	C	A	G	C	C	T	T	C	C	G	T	G	G
patient 21	12	0	C	C	C	T	C	C	C	C	A	G	C	C	C	C	C	T	T	T	A	G
patient 22	14	0	C	C	C	C	C	C	A	C	A	A	C	C	T	T	C	C	G	T	G	G
patient 23	14	0	A	A	T	T	C	T	C	C	A	A	C	C	T	T	C	T	G	T	G	G
patient 24	14	0	A	C	T	T	C	C	C	C	A	A	C	C	C	T	C	C	G	T	G	G
patient 25	15	0	A	C	T	T	C	T	C	C	A	G	C	C	C	T	C	C	T	T	G	G
patient 26	16	0	C	C	T	T	C	C	C	C	A	G	C	C	C	T	T	T	G	T	G	G
patient 27	17	0	A	C	C	T	C	C	A	C	A	A	C	C	C	T	C	T	G	G	G	G
patient 28	18	0	A	C	T	T	C	C	A	A	G	G	C	C	C	T	T	T	G	G	A	G
patient 29	18	0	A	A	T	T	C	C	A	C	A	A	C	C	C	T	C	C	G	G	G	G
patient 30	19	0	A	A	T	T	C	T	C	C	G	G	C	C	C	C	C	C	T	T	G	G
patient 31	19	0	A	C	T	T	C	C	A	C	A	A	C	C	T	T	T	T	G	G	G	G
patient 32	20	0	C	C	T	T	C	C	A	C	A	G	C	C	T	T	T	T	G	G	G	G
patient 33	21	0	A	A	T	T	C	C	A	C	A	G	C	C	T	T	C	C	T	T	G	G
patient 34	22	0	C	C	T	T	C	T	A	C	A	A	C	C	C	T	C	C	G	G	G	G
patient 35	37	0	C	C	C	T	C	C	A	C	A	A	C	C	C	T	T	T	G	T	G	G
patient 36	11	3	A	A	T	T	C	C	C	C	G	G	C	C	C	T	C	T	G	T	G	G
patient 37	4	4	A	C	T	T	C	C	C	C	A	A	C	C	0	0	T	T	G	G	G	G
patient 38	8	4	A	C	T	T	C	T	C	C	A	G	C	C	C	C	C	C	G	T	G	G
patient 39	5	5	A	C	T	T	C	C	C	C	A	G	C	C	C	C	C	C	G	T	G	G
patient 40	11	6	C	C	C	T	C	T	C	C	A	G	C	C	C	T	C	C	G	G	G	G
patient 41	18	7	A	A	T	T	C	T	C	C	A	G	C	T	T	T	C	C	G	T	G	G
patient 42	0	9	A	A	C	T	C	C	A	C	A	G	C	C	T	T	C	C	G	T	G	G
patient 43	10	9	A	A	T	T	C	T	C	C	A	A	C	C	T	T	T	T	G	T	G	G
patient 44	0	10	A	A	T	T	C	T	C	C	A	A	C	C	C	C	C	C	T	T	G	G
patient 45	3	10	A	C	C	T	C	T	C	C	G	G	C	C	C	C	C	T	G	T	G	G
patient 46	21	11	A	A	C	C	C	C	C	C	G	G	C	C	T	T	C	C	G	T	G	G
patient 47	4	12	A	A	T	T	C	T	A	C	G	G	C	C	T	T	C	C	G	G	G	G
patient 48	21	12	A	A	T	T	C	T	C	C	A	A	C	C	C	T	C	C	G	G	G	G
patient 49	1	14	A	A	T	T	C	T	A	C	A	G	C	C	C	T	C	C	T	T	G	G
patient 50	8	14	A	C	T	T	C	C	A	C	A	A	C	C	C	T	C	T	G	T	G	G
patient 51	4	15	A	C	C	T	C	T	C	C	A	G	C	C	C	T	C	T	G	G	A	G
patient 52	8	15	A	C	C	T	C	T	A	A	A	G	C	C	T	T	T	T	G	T	G	G
patient 53	17	15	A	C	T	T	C	T	C	C	A	A	C	C	C	C	C	C	G	T	G	G
patient 54	0	16	A	C	T	T	C	T	C	C	G	G	C	C	C	T	C	C	G	G	G	G
patient 55	6	16	A	A	T	T	C	C	C	C	A	G	C	C	C	C	C	C	T	T	G	G
patient 56	25	16	C	C	T	T	C	C	A	C	A	A	C	C	T	T	C	C	G	G	G	G
patient 57	17	17	A	C	C	T	C	C	C	C	A	A	C	C	T	T	C	C	G	T	G	G
patient 58	3	21	A	A	T	T	T	T	C	C	0	0	C	C	C	T	C	C	T	T	G	G
patient 59	9	26	A	A	C	T	C	C	C	C	G	G	C	C	T	T	T	T	G	T	G	G
patient 60	0	27	A	C	C	T	C	C	A	C	A	G	C	C	C	C	C	C	G	T	G	G
patient 61	26	28	A	C	T	T	C	C	A	A	G	G	C	C	C	T	C	C	T	T	G	G
patient 62	14	29	A	C	C	T	C	C	A	C	G	G	C	C	C	T	C	C	T	T	G	G
patient 63	5	32	A	C	C	T	C	C	A	C	G	G	C	C	T	T	C	C	G	T	G	G
patient 64	3	33	A	C	C	T	C	T	A	C	A	A	C	C	C	C	C	C	T	T	G	G
patient 65	11	33	A	C	T	T	C	C	A	C	A	G	C	C	T	T	C	C	G	T	G	G
patient 66	1	37	A	C	C	T	C	C	A	C	A	A	C	C	C	T	C	T	T	T	G	G
patient 67	7	37	A	C	T	T	C	C	C	C	A	G	C	C	T	T	C	T	G	T	G	G
patient 68	13	42	A	C	T	T	T	T	C	C	G	G	C	C	C	T	C	T	G	T	G	G
patient 69	4	44	A	A	T	T	C	C	A	C	A	G	C	C	C	T	C	T	G	G	G	G
patient 70	6	51	A	A	C	T	C	C	C	C	A	G	C	C	C	C	C	T	G	T	G	G
patient 71	9	52	A	A	T	T	C	T	A	C	A	A	C	C	C	T	C	C	G	T	G	G
patient 72	7	54	A	C	T	T	C	C	C	C	A	G	C	C	C	T	C	T	G	T	G	G
patient 73	10	54	A	A	T	T	C	C	A	C	A	A	C	C	C	T	C	T	T	T	G	G
patient 74	1	56	A	A	T	T	C	C	A	C	A	A	C	C	T	T	C	C	G	T	G	G
patient 75	11	57	A	A	T	T	C	C	C	C	A	G	C	C	T	T	C	C	T	T	G	G
patient 76	8	60	A	C	T	T	C	T	C	C	A	G	C	C	C	T	T	T	G	G	A	G
patient 77	13	60	A	C	C	T	C	C	A	C	A	G	C	C	C	T	C	T	G	T	G	G
patient 78	4	62	A	A	T	T	C	C	C	C	A	G	C	C	T	T	T	T	G	G	A	G
patient 79	7	62	A	A	T	T	C	T	A	C	A	A	C	C	C	C	C	C	T	T	G	G
patient 80	7	62	A	C	T	T	C	C	A	C	A	A	C	C	T	T	C	T	G	T	G	G
patient 81	3	63	A	A	T	T	C	C	A	C	G	G	C	C	C	C	C	C	T	T	G	G
patient 82	1	64	A	C	T	T	C	T	A	C	A	G	C	C	C	T	C	C	T	T	G	G
patient 83	5	64	A	A	T	T	C	T	C	C	A	G	C	C	T	T	T	T	G	G	G	G
patient 84	4	70	A	C	T	T	C	C	A	C	G	G	C	C	C	C	C	T	G	G	G	G
patient 85	22	71	A	A	T	T	C	C	A	C	A	A	C	C	T	T	C	T	G	G	G	G
patient 86	2	74	A	C	C	T	C	C	C	C	A	A	C	C	C	T	C	C	G	G	G	G
patient 87	5	74	A	C	C	T	C	C	C	C	G	G	C	C	T	T	C	C	G	T	G	G
patient 88	8	77	A	C	C	T	C	C	C	C	G	G	C	C	C	C	T	T	G	G	G	G
patient 89	23	77	A	C	T	T	C	C	A	C	A	A	C	C	C	T	C	C	G	T	G	G
patient 90	13	80	A	A	T	T	C	C	C	C	A	A	C	C	C	T	C	C	T	T	G	G
patient 91	6	83	C	C	T	T	C	C	A	C	A	G	C	C	C	T	C	C	G	T	G	G
patient 92	6	83	A	C	C	T	C	T	A	C	A	A	C	C	C	T	C	T	G	T	A	G
patient 93	17	84	A	C	C	T	C	C	C	C	A	A	C	C	C	T	C	T	G	T	G	G
patient 94	6	90	A	A	T	T	C	C	C	C	A	G	C	C	C	T	C	C	T	T	G	G
patient 95	17	90	A	A	T	T	C	C	A	C	A	G	C	C	C	C	C	T	G	G	A	G
patient 96	4	92	A	C	C	T	C	C	A	C	A	G	C	C	C	T	C	T	T	T	G	G
patient 97	3	95	C	C	C	T	C	C	C	C	A	G	C	C	C	T	C	T	G	G	G	G
patient 98	11	97	A	A	T	T	C	C	A	C	A	G	C	C	C	T	C	C	T	T	G	G
patient 99	11	97	A	A	T	T	C	C	C	C	A	A	C	C	C	T	C	C	T	T	G	G
patient 100	3	98	A	C	T	T	C	T	C	C	A	G	C	C	T	T	T	T	T	T	G	G
patient 101	20	98	A	A	T	T	C	C	A	C	G	G	C	C	T	T	C	C	G	T	G	G
patient 102	9	99	A	C	T	T	T	T	C	C	A	G	C	C	C	C	C	T	G	T	G	G
patient 103	19	106	A	C	C	T	C	C	A	A	A	A	C	C	C	T	C	T	G	G	G	G
patient 104	9	111	A	C	T	T	C	C	C	C	A	G	C	C	C	T	C	T	G	T	G	G
patient 105	21	113	C	C	C	T	C	T	A	C	A	G	C	C	T	T	C	C	T	T	G	G
patient 106	8	117	A	C	C	C	C	C	C	C	A	A	C	C	C	T	C	C	G	T	G	G
patient 107	15	122	A	A	T	T	C	C	A	C	G	G	C	C	T	T	C	T	G	G	G	G
patient 108	14	123	A	A	T	T	C	C	A	C	G	G	C	C	C	T	C	T	G	T	G	G
patient 109	5	125	A	A	C	T	C	T	A	C	A	G	C	C	T	T	C	T	G	G	G	G
patient 110	10	129	A	A	T	T	C	C	0	0	G	G	C	C	C	T	C	C	G	G	G	G
patient 111	4	130	A	A	T	T	C	C	A	C	G	G	C	C	C	C	C	T	T	T	G	G
patient 112	5	134	A	C	T	T	C	C	A	C	A	A	C	C	T	T	T	T	G	G	G	G
patient 113	23	134	A	A	T	T	C	C	A	A	G	G	C	C	C	T	T	T	G	G	G	G
patient 114	2	135	A	C	C	T	C	C	A	C	A	G	C	C	C	C	C	C	T	T	G	G
patient 115	7	135	A	A	T	T	C	C	A	C	A	G	C	C	C	T	C	T	G	T	G	G
patient 116	4	142	C	C	T	T	C	C	C	C	A	A	C	C	T	T	T	T	G	T	G	G
patient 117	12	150	A	C	C	T	C	C	A	C	A	G	C	C	C	C	C	T	G	T	G	G
patient 118	15	157	A	A	T	T	C	T	A	A	A	G	C	C	T	T	C	C	G	T	G	G
patient 119	18	157	A	A	C	C	C	C	C	C	A	G	C	C	T	T	C	C	T	T	G	G
patient 120	27	164	A	C	C	T	C	C	A	C	A	G	C	C	C	T	C	T	G	T	G	G
patient 121	4	191	A	A	T	T	C	C	A	C	G	G	C	C	C	T	T	T	G	G	G	G
patient 122	19	198	A	C	T	T	C	C	C	C	A	G	C	C	T	T	C	C	G	T	G	G
patient 123	8	214	A	A	T	T	C	C	A	C	A	G	C	C	T	T	C	C	T	T	G	G
patient 124	7	225	A	C	T	T	C	C	A	C	A	A	C	C	C	C	C	C	G	T	G	G
patient 125	24	226	A	C	C	C	C	T	A	C	A	G	C	C	C	T	C	T	G	T	G	G
patient 126	16	228	A	A	T	T	C	C	A	C	A	A	C	C	C	T	C	C	G	G	G	G
patient 127	9	236	C	C	T	T	C	C	C	C	A	A	C	C	C	T	C	C	G	G	G	G
patient 128	13	242	C	C	C	T	C	T	C	C	G	G	C	C	C	T	C	T	G	G	A	G
patient 129	4	246	C	C	T	T	C	C	C	C	G	G	C	C	C	T	T	T	G	G	G	G
patient 130	4	246	C	C	T	T	C	C	C	C	A	A	C	C	C	T	C	C	G	G	G	G
patient 131	1	257	A	C	T	T	C	C	C	C	A	A	C	C	C	T	C	C	G	G	G	G
patient 132	16	261	A	C	C	T	C	C	C	C	A	G	C	C	C	T	C	C	T	T	G	G
patient 133	35	270	A	A	C	T	C	C	C	C	A	G	C	C	T	T	C	C	G	T	G	G
patient 134	13	288	A	C	T	T	C	T	A	C	A	A	C	C	C	C	C	C	T	T	G	G
patient 135	27	318	A	A	C	T	C	C	A	C	A	G	C	C	T	T	C	C	T	T	G	G
patient 136	13	328	A	A	T	T	C	C	C	C	A	G	C	C	T	T	C	C	T	T	G	G
patient 137	9	332	A	A	C	C	C	C	A	C	G	G	C	C	T	T	T	T	G	T	G	G
patient 138	16	343	C	C	T	T	C	C	C	C	A	A	C	C	C	C	T	T	G	G	G	G
patient 139	18	345	A	C	C	T	C	C	C	C	A	A	C	C	C	T	C	T	T	T	G	G
patient 140	23	354	A	A	T	T	C	T	A	A	A	A	C	C	T	T	C	T	G	T	G	G
patient 141	13	362	A	C	T	T	C	C	C	C	A	A	C	C	C	T	C	T	G	T	A	G
patient 142	19	404	A	C	C	T	C	C	C	C	A	G	C	C	C	C	C	T	G	T	G	G
patient 143	4	425	A	A	T	T	T	T	A	C	A	G	C	C	T	T	C	C	T	T	G	G
patient 144	3	449	A	A	T	T	T	T	A	C	A	A	C	C	T	T	C	T	G	T	G	G
patient 145	1	451	A	A	C	T	C	C	A	C	A	G	C	C	C	C	C	C	T	T	G	G
patient 146	4	463	A	A	C	C	C	T	C	C	A	A	C	C	C	C	T	T	T	T	G	G
patient 147	30	483	A	A	T	T	T	T	A	A	A	G	C	C	T	T	C	C	T	T	G	G
patient 148	2	500	C	C	T	T	C	T	C	C	G	G	C	C	C	T	C	C	G	T	G	G
patient 149	3	500	A	A	C	T	C	C	C	C	A	G	C	C	C	T	C	C	G	T	G	G
patient 150	3	500	A	A	C	T	C	C	A	A	A	G	C	C	T	T	C	C	G	T	G	G
patient 151	3	500	A	A	C	T	C	C	A	C	A	A	C	C	C	C	C	C	T	T	G	G
patient 152	13	500	A	C	T	T	C	T	A	C	A	G	C	C	C	C	C	C	G	T	G	G
patient 153	21	500	A	C	T	T	C	T	C	C	A	A	C	C	T	T	C	C	T	T	G	G
patient 154	22	500	C	C	C	T	C	T	C	C	A	A	C	C	C	C	C	C	G	T	G	G
patient 155	36	500	A	C	T	T	C	T	C	C	G	G	C	C	C	C	C	C	G	T	G	G
patient 156	12	694	A	A	C	T	C	C	C	C	A	G	C	C	C	T	C	C	T	T	G	G
patient 157	13	3000	A	C	T	T	C	C	A	C	A	G	C	C	C	C	C	T	G	G	A	G
patient 158	15		A	A	T	T	C	C	C	C	A	G	C	C	C	T	T	T	G	G	G	G
patient 159	0		A	A	T	T	C	C	A	C	A	G	C	C	C	T	0	0	G	G	A	G
patient 160	0		C	A	C	T	C	C	A	C	A	A	C	C	T	T	0	0	T	T	G	G
patient 161	0		C	A	0	0	C	C	0	0	G	G	0	0	C	T	0	0	T	T	G	G
patient 162	1		C	C	T	T	C	C	A	C	A	A	C	C	C	T	C	C	G	T	G	G
patient 163	1		C	C	T	T	C	T	C	C	A	G	C	C	C	C	C	C	G	T	G	G
patient 164	1		A	C	T	T	C	C	A	C	G	G	C	C	C	T	C	T	G	T	G	G
patient 165	1		A	A	T	T	C	C	A	C	A	G	C	C	T	T	0	0	T	T	G	G
patient 166	1		C	A	0	0	T	C	0	0	G	G	0	0	C	C	0	0	G	G	G	G
patient 167	1		A	A	C	T	C	C	A	A	A	G	C	C	C	T	0	0	T	T	G	G
patient 168	2		A	C	C	T	C	C	A	C	A	G	C	C	C	T	C	C	T	T	G	G
patient 169	2		C	C	T	T	C	T	C	C	A	G	C	C	C	C	C	C	T	T	G	G
patient 170	2		A	C	C	T	C	C	A	C	G	G	C	C	C	T	C	T	G	T	G	G
patient 171	2		A	A	T	T	T	C	C	C	A	G	C	C	T	T	0	0	G	T	G	G
patient 172	2		C	C	T	T	T	C	A	C	A	A	C	C	C	T	0	0	G	T	G	G
patient 173	2		C	A	T	T	C	C	A	C	A	G	C	C	C	C	0	0	T	T	G	G
patient 174	2		A	A	T	T	C	C	C	C	A	G	C	C	C	T	0	0	G	T	G	G
patient 175	2		C	A	T	T	C	C	A	C	A	G	C	C	C	T	0	0	G	T	G	G
patient 176	2		A	A	C	T	C	C	A	C	A	A	T	C	T	T	0	0	T	T	G	G
patient 177	3		A	A	C	T	C	C	A	C	A	G	C	C	C	T	C	C	T	T	G	G
patient 178	3		A	A	C	T	C	T	C	C	G	G	C	C	C	T	C	T	G	T	G	G
patient 179	3		A	C	C	T	C	C	A	C	A	G	C	C	T	T	C	T	G	T	G	G
patient 180	3		A	C	T	T	C	C	C	C	A	G	C	C	T	T	C	T	G	G	G	G
patient 181	3		C	C	T	T	T	T	C	C	A	A	C	C	C	T	C	C	G	T	G	G
patient 182	3		A	A	C	T	C	C	A	C	A	A	C	C	C	T	0	0	G	T	G	G
patient 183	3		A	A	C	T	C	C	A	C	G	G	C	C	C	C	0	0	G	T	G	G
patient 184	3		C	A	T	T	C	C	C	C	A	G	T	C	T	T	0	0	G	T	G	G
patient 185	3		C	A	C	T	C	C	C	C	A	G	C	C	C	T	0	0	G	G	G	G
patient 186	3		A	A	0	0	T	C	0	0	G	G	0	0	C	C	0	0	G	T	G	G
patient 187	4		A	A	T	T	C	T	A	C	A	G	C	C	T	T	T	T	G	G	G	G
patient 188	4		A	A	C	T	C	C	C	C	G	G	C	C	T	T	C	T	G	T	G	G
patient 189	4		A	C	T	T	C	T	C	C	A	A	C	C	C	T	C	C	T	T	G	G
patient 190	4		A	C	T	T	C	T	C	C	G	G	C	C	C	T	C	C	T	T	G	G
patient 191	4		A	C	C	C	C	C	C	C	A	A	C	T	C	T	C	C	G	T	G	G
patient 192	4		A	C	T	T	C	T	C	C	G	G	C	C	C	T	C	C	G	G	G	G
patient 193	4		C	A	C	T	C	C	C	C	A	G	C	C	C	T	0	0	G	T	G	G
patient 194	4		A	A	C	T	C	C	A	C	A	G	C	C	C	T	0	0	G	T	G	G
patient 195	4		A	A	T	T	C	C	A	C	G	G	C	C	T	T	0	0	T	T	G	G
patient 196	4		C	A	C	T	C	C	C	C	A	A	T	C	T	T	0	0	G	G	G	G
patient 197	5		A	C	C	T	C	C	A	C	G	G	C	C	C	T	C	C	T	T	G	G
patient 198	5		A	A	C	C	C	C	A	C	G	G	C	C	T	T	C	T	G	T	G	G
patient 199	5		A	A	C	T	T	T	A	C	A	G	C	C	T	T	C	T	G	T	G	G
patient 200	5		A	A	C	T	C	T	C	C	A	G	C	C	C	T	C	T	T	T	G	G
patient 201	5		A	A	T	T	C	C	A	C	A	A	C	C	T	T	C	C	G	G	G	G
patient 202	5		A	C	T	T	C	C	A	C	A	G	C	C	C	T	C	C	T	T	G	G
patient 203	5		A	A	C	T	C	C	A	A	G	G	C	C	C	T	0	0	G	G	G	G
patient 204	5		C	A	C	T	C	C	C	C	A	G	C	C	C	T	0	0	G	G	G	G
patient 205	5		C	A	0	0	T	T	0	0	A	G	0	0	T	T	0	0	G	T	G	G
patient 206	5		C	A	T	T	C	C	A	C	A	A	C	C	C	T	0	0	G	T	G	G
patient 207	5		C	A	T	T	C	C	C	C	G	G	C	C	C	T	0	0	G	T	G	G
patient 208	5		C	A	C	T	C	C	C	C	A	G	C	C	C	T	0	0	G	T	G	G
patient 209	6		A	A	T	T	T	T	C	C	A	G	C	C	C	T	C	T	G	T	A	G
patient 210	6		A	C	C	T	C	C	A	C	0	0	C	C	0	0	C	C	T	T	G	G
patient 211	6		A	C	T	T	C	T	C	C	G	G	C	C	T	T	C	T	T	T	G	G
patient 212	6		A	A	T	T	T	T	C	C	A	G	C	C	C	C	C	T	G	T	G	G
patient 213	6		A	C	T	T	C	T	C	C	A	G	C	C	C	T	C	T	G	T	G	G
patient 214	6		A	C	T	T	C	T	C	C	A	A	C	C	C	T	C	T	G	G	G	G
patient 215	6		A	C	T	T	C	C	C	C	A	G	C	C	T	T	C	C	T	T	G	G
patient 216	6		A	A	C	T	T	C	A	C	A	G	C	C	T	T	0	0	G	T	A	G
patient 217	6		C	C	C	T	T	C	C	C	A	A	C	C	T	T	0	0	G	T	G	G
patient 218	6		C	C	C	T	C	C	C	C	A	A	C	C	C	T	0	0	G	G	G	G
patient 219	6		C	C	T	T	C	C	C	C	G	G	C	C	C	T	0	0	G	T	G	G
patient 220	6		C	C	T	T	T	T	C	C	G	G	C	C	C	T	0	0	G	T	G	G
patient 221	6		A	A	T	T	C	C	A	C	G	G	C	C	C	T	0	0	T	T	G	G
patient 222	7		A	A	T	T	C	C	A	A	0	0	C	C	C	C	C	C	T	T	G	G
patient 223	7		C	C	T	T	C	C	A	C	A	G	C	C	T	T	C	C	G	T	G	G
patient 224	7		A	A	T	T	C	T	A	C	A	G	C	C	T	T	C	C	T	T	G	G
patient 225	7		A	A	T	T	T	T	A	C	A	A	C	C	T	T	C	C	T	T	G	G
patient 226	7		A	A	T	T	C	C	C	C	A	G	C	C	C	T	C	C	G	T	G	G
patient 227	7		A	A	T	T	C	C	A	C	A	G	C	C	T	T	C	T	G	T	G	G
patient 228	7		C	A	C	C	C	C	A	C	A	A	C	C	T	T	0	0	G	T	G	G
patient 229	7		C	A	C	T	C	C	A	C	G	G	C	C	C	T	0	0	T	T	G	G
patient 230	7		A	A	C	T	T	T	C	C	A	A	C	C	C	T	0	0	G	T	G	G
patient 231	7		C	A	0	0	C	C	0	0	G	G	0	0	C	T	0	0	T	T	G	G
patient 232	8		A	A	T	T	C	C	C	C	A	G	C	C	T	T	C	C	T	T	G	G
patient 233	8		A	C	T	T	C	C	A	C	A	G	C	C	T	T	C	C	T	T	G	G
patient 234	8		A	C	C	C	C	T	C	C	A	G	C	C	C	T	C	T	G	T	G	G
patient 235	8		A	A	C	T	C	T	C	C	G	G	C	C	T	T	C	C	G	T	G	G
patient 236	8		A	C	T	T	C	C	C	C	G	G	C	C	C	C	C	C	G	T	G	G
patient 237	8		A	A	T	T	T	C	C	C	G	G	C	C	C	T	0	0	G	G	G	G
patient 238	8		C	A	C	T	C	C	A	C	G	G	C	C	C	C	0	0	T	T	G	G
patient 239	8		C	A	T	T	T	T	A	C	A	G	C	C	C	C	0	0	T	T	G	G
patient 240	8		A	A	0	0	T	C	0	0	A	G	0	0	C	C	0	0	G	T	G	G
patient 241	9		C	C	T	T	C	C	C	C	A	A	C	C	T	T	T	T	G	G	G	G
patient 242	9		A	C	C	T	C	C	A	C	A	G	C	C	T	T	C	T	T	T	G	G
patient 243	9		A	C	C	T	C	C	C	C	A	G	C	C	C	T	C	T	T	T	G	G
patient 244	9		A	C	T	T	C	C	A	C	A	G	C	C	C	T	C	C	T	T	G	G
patient 245	9		A	C	T	T	C	T	C	C	A	A	C	C	C	T	C	C	T	T	G	G
patient 246	9		C	C	T	T	C	C	C	C	A	A	C	C	C	T	C	C	T	T	G	G
patient 247	9		C	C	T	T	T	C	A	C	A	G	C	C	T	T	0	0	T	T	G	G
patient 248	9		C	A	T	T	C	C	A	C	A	G	C	C	C	C	0	0	G	T	G	G
patient 249	9		A	A	C	T	C	C	C	C	A	G	C	C	C	C	0	0	T	T	G	G
patient 250	9		C	C	C	T	C	C	C	C	A	A	C	C	T	T	0	0	G	T	G	G
patient 251	9		A	A	T	T	C	C	A	C	A	G	T	C	T	T	0	0	T	T	G	G
patient 252	9		C	A	T	T	C	C	C	C	A	G	C	C	C	C	0	0	G	T	G	G
patient 253	10		A	A	C	T	C	C	A	A	G	G	C	C	C	C	C	C	T	T	G	G
patient 254	10		A	A	C	T	C	C	A	C	A	A	C	C	C	T	T	T	G	T	A	G
patient 255	10		A	C	T	T	C	T	C	C	A	G	C	C	C	T	C	C	G	T	G	G
patient 256	10		C	C	T	T	C	C	A	C	A	G	C	C	T	T	C	C	T	T	G	G
patient 257	10		A	A	T	T	C	C	C	C	G	G	C	C	C	C	C	C	T	T	G	G
patient 258	10		C	A	T	T	C	C	A	C	G	G	C	C	T	T	0	0	T	T	G	G
patient 259	11		A	C	T	T	C	T	A	A	A	G	C	C	C	C	C	T	G	T	G	G
patient 260	11		C	C	C	T	C	C	C	C	A	A	C	C	C	T	C	T	T	T	G	G
patient 261	11		A	A	T	T	C	C	C	C	G	G	C	C	T	T	C	T	G	T	G	G
patient 262	11		A	A	T	T	C	C	C	C	A	G	C	C	T	T	C	C	G	T	G	G
patient 263	11		A	C	C	T	C	C	A	C	G	G	C	C	C	C	C	T	G	G	A	G
patient 264	11		C	A	C	C	C	C	C	C	A	G	C	C	C	T	0	0	T	T	G	G
patient 265	11		A	A	T	T	C	C	C	C	G	G	C	C	C	T	0	0	G	T	G	G
patient 266	12		A	C	C	T	C	C	A	C	0	0	C	C	0	0	C	C	T	T	G	G
patient 267	12		A	C	T	T	T	T	C	C	G	G	C	C	T	T	C	T	G	G	A	G
patient 268	12		A	C	T	T	C	C	C	C	A	A	C	C	C	T	T	T	G	T	G	G
patient 269	12		C	A	T	T	C	C	A	C	A	G	C	C	C	T	0	0	T	T	G	G
patient 270	12		A	A	0	0	T	C	0	0	A	G	0	0	T	T	0	0	G	G	G	G
patient 271	13		A	A	C	T	C	C	C	C	A	A	C	C	T	T	0	0	G	T	G	G
patient 272	13		C	C	T	T	C	C	C	C	A	A	T	C	C	T	0	0	T	T	G	G
patient 273	14		C	C	T	T	C	T	C	C	A	G	C	C	C	T	C	C	T	T	0	0
patient 274	14		A	C	C	T	C	C	A	C	G	G	C	C	T	T	C	T	G	T	G	G
patient 275	14		C	C	T	T	C	C	C	C	G	G	C	C	C	T	C	C	G	G	G	G
patient 276	14		C	A	C	T	T	C	A	C	A	G	C	C	C	T	0	0	T	T	G	G
patient 277	14		C	A	C	T	C	C	A	C	A	G	C	C	C	T	0	0	T	T	G	G
patient 278	15		A	C	T	T	C	C	A	C	0	0	C	C	T	T	T	T	G	T	A	A
patient 279	15		C	C	C	T	C	C	C	C	A	G	C	C	C	T	C	C	G	T	G	G
patient 280	15		A	A	C	T	C	C	A	C	A	G	C	C	C	T	C	T	G	T	G	G
patient 281	15		A	A	0	0	T	C	0	0	A	A	0	0	C	C	0	0	G	T	G	G
patient 282	16		A	C	T	T	C	T	C	C	A	G	C	C	C	T	C	C	T	T	G	G
patient 283	16		C	C	C	C	C	C	A	C	G	G	C	C	T	T	T	T	G	T	A	G
patient 284	16		A	C	T	T	C	C	C	C	G	G	C	C	C	T	C	T	G	T	G	G
patient 285	16		C	C	T	T	T	C	A	C	G	G	C	C	C	T	0	0	T	T	G	G
patient 286	17		A	A	T	T	C	T	C	C	A	G	0	0	T	T	C	T	T	T	G	G
patient 287	17		C	A	T	T	T	C	A	C	A	A	C	C	T	T	0	0	G	T	G	G
patient 288	17		C	C	T	T	C	C	C	C	A	G	T	C	C	T	0	0	G	T	G	G
patient 289	18		A	A	T	T	C	C	A	A	G	G	C	C	C	C	C	C	T	T	G	G
patient 290	18		A	A	C	T	C	C	C	C	A	G	C	C	T	T	C	T	G	T	G	G
patient 291	18		A	A	T	T	C	C	C	C	G	G	C	C	T	T	C	T	G	T	G	G
patient 292	18		A	C	C	T	C	T	C	C	A	G	C	C	C	T	C	C	G	T	G	G
patient 293	19		A	C	C	T	C	T	A	A	A	A	C	C	C	T	T	T	G	T	G	G
patient 294	20		A	A	C	T	C	T	C	C	A	A	C	C	C	T	C	T	G	T	G	G
patient 295	20		A	A	C	T	C	C	C	C	A	G	C	C	C	T	C	T	G	T	G	G
patient 296	20		C	C	C	T	C	T	A	C	A	G	C	C	C	T	C	C	T	T	G	G
patient 297	20		A	A	T	T	C	C	C	C	A	A	C	C	C	T	0	0	G	T	G	G
patient 298	21		A	C	C	T	C	C	C	C	G	G	C	C	C	T	C	T	G	T	A	G
patient 299	21		A	C	C	T	T	T	A	A	A	G	C	C	C	T	C	C	G	T	G	G
patient 300	21		C	A	T	T	T	C	A	C	G	G	T	C	C	T	0	0	G	T	G	G
patient 301	22		A	A	T	T	C	C	A	A	A	G	C	C	C	T	C	T	G	T	G	G
patient 302	22		C	C	C	C	C	C	A	C	A	A	C	C	C	T	C	C	T	T	G	G
patient 303	22		A	C	T	T	C	C	C	C	A	G	C	C	C	T	C	C	G	G	G	G
patient 304	23		A	C	T	T	C	C	C	C	A	A	C	C	C	T	C	C	T	T	G	G
patient 305	25		A	C	T	T	C	C	C	C	A	A	C	C	C	T	C	T	T	T	G	G
patient 306	25		A	A	C	C	T	C	C	C	G	G	C	C	C	T	0	0	T	T	G	G
patient 307	26		A	C	C	T	C	C	C	C	A	G	C	C	C	T	C	C	G	T	G	G
patient 308	27		A	A	T	T	C	T	C	C	A	G	C	C	T	T	C	C	T	T	G	G
control 1			A	A	T	C	C	C	A	A	G	A	C	C	T	T	C	T	G	T	G	G
control 2			A	A	T	C	C	C	C	C	G	A	C	C	T	C	C	T	T	T	G	G
control 3			A	A	T	T	C	C	C	C	A	A	C	C	T	T	0	0	0	0	0	0
control 4			0	0	T	T	C	C	0	0	0	0	C	C	T	T	0	0	0	0	0	0
control 5			A	A	T	T	C	C	C	A	G	G	C	C	T	C	C	T	T	T	G	G
control 6			A	C	T	C	C	T	C	C	G	A	C	C	T	T	C	C	G	G	G	G
control 7			A	C	T	T	C	T	C	A	G	A	C	C	T	C	T	T	G	G	G	A
control 8			A	A	T	C	C	C	C	A	G	A	C	C	T	C	C	T	G	T	G	G
control 9			A	C	T	T	C	T	C	A	A	A	C	C	T	C	C	C	0	0	G	G
control 10			A	A	T	C	C	T	C	A	G	G	C	C	T	C	C	C	G	T	G	G
control 11			A	C	T	T	T	T	C	A	G	A	C	C	T	T	C	T	T	T	G	G
control 12			0	0	0	0	0	0	0	0	0	0	C	C	0	0	C	T	G	T	G	G
control 13			C	C	T	C	C	T	C	C	G	G	C	C	T	C	T	T	G	T	G	G
control 14			A	A	T	T	C	C	C	C	G	A	C	C	T	C	C	T	T	T	G	G
control 15			C	C	T	T	C	C	C	A	G	A	C	C	T	C	C	C	G	T	G	G
control 16			A	C	T	C	C	C	C	C	G	G	C	C	T	C	C	T	G	G	G	G
control 17			A	A	T	T	C	C	C	A	G	A	C	C	T	C	C	C	T	T	G	G
control 18			A	C	T	C	C	T	C	A	A	A	C	C	T	C	C	C	G	T	G	G
control 19			A	C	T	C	C	C	A	A	A	A	C	C	T	T	C	T	G	G	G	G
control 20			C	C	T	C	C	C	C	A	G	A	C	C	T	T	C	T	G	T	G	G
control 21			A	A	C	C	C	C	C	C	G	A	C	C	T	C	T	T	G	G	G	A
control 22			A	C	T	C	C	C	C	A	G	A	C	C	T	C	C	C	T	T	G	G
control 23			0	0	0	0	0	0	0	0	0	0	C	C	C	C	C	C	G	T	G	G
control 24			A	C	T	C	T	T	C	A	G	G	C	C	T	C	C	T	G	T	G	G
control 25			A	A	T	C	C	C	C	C	G	A	C	C	T	C	C	T	T	T	G	G
control 26			A	C	C	C	C	C	A	A	G	G	C	C	T	C	C	T	G	T	G	G
control 27			A	A	T	C	C	C	C	A	G	A	C	C	C	C	T	T	G	G	G	G
control 28			0	0	T	T	C	C	C	C	G	A	C	C	T	T	T	T	G	G	A	A
control 29			0	0	T	T	C	C	C	A	A	A	C	C	T	C	C	T	G	T	G	G
control 30			0	0	0	0	0	0	0	0	0	0	C	C	0	0	C	T	G	T	G	G
control 31			A	A	T	T	C	C	C	C	G	G	C	C	T	T	C	C	T	T	G	G
control 32			A	C	T	C	C	C	C	A	G	G	C	C	T	C	T	T	G	T	G	G
control 33			C	C	T	C	C	C	C	A	G	A	C	C	T	T	C	T	G	G	G	G
control 34			A	A	C	C	C	C	C	A	G	A	C	C	T	C	C	C	T	T	G	G
control 35			0	0	0	0	0	0	A	A	0	0	C	C	0	0	C	T	G	G	G	G
control 36			A	C	T	T	C	C	C	C	G	A	C	C	T	C	C	C	T	T	G	G
control 37			A	A	T	T	C	C	C	C	A	A	C	C	T	C	C	T	T	T	G	G
control 38			0	0	0	0	0	0	0	0	0	0	C	C	0	0	C	T	G	T	G	G
control 39			A	A	T	C	C	C	A	A	G	A	C	C	T	C	C	T	G	T	G	G
control 40			A	A	T	T	T	T	C	A	G	A	C	C	T	T	C	C	G	G	G	G
control 41			A	C	T	C	C	C	C	C	A	A	C	C	T	C	C	T	G	T	G	A
control 42			0	0	0	0	C	C	0	0	0	0	C	C	0	0	C	T	G	G	G	G
control 43			A	A	C	C	C	C	C	A	G	A	C	C	C	C	C	C	G	T	G	G
control 44			C	C	T	C	C	C	C	A	G	A	C	C	T	T	C	C	G	T	G	G
control 45			A	C	T	T	C	C	C	C	G	G	C	C	T	C	T	T	T	T	G	G
control 46			A	C	T	C	C	C	C	A	G	A	C	C	T	C	C	C	G	T	G	G
control 47			A	C	T	C	C	C	C	A	G	G	C	C	T	T	C	T	G	G	G	A
control 48			A	C	T	T	C	C	A	A	G	G	C	C	T	T	C	T	G	T	G	G
control 49			C	C	T	C	C	C	C	A	G	G	C	C	T	C	C	C	G	G	G	G
control 50			A	C	T	T	C	C	C	C	G	G	C	C	C	C	C	T	G	T	G	G
control 51			0	0	0	0	C	C	0	0	0	0	C	C	0	0	C	C	G	T	G	G
control 52			A	C	T	T	C	T	C	C	G	G	C	C	C	C	C	T	G	T	G	G
control 53			A	C	T	T	T	T	C	C	A	A	C	C	T	C	C	T	T	T	G	G
control 54			A	A	T	T	C	C	C	C	A	A	C	C	T	T	C	T	G	G	G	G
control 55			A	A	T	T	C	T	C	C	0	0	C	C	0	0	C	T	G	T	G	G
control 56			A	A	T	C	C	C	C	C	G	G	C	C	T	T	C	C	T	T	G	G
control 57			A	C	T	C	C	C	C	C	G	A	C	C	C	C	C	T	G	T	G	G
control 58			C	C	T	C	C	C	C	C	G	G	C	C	T	C	C	T	G	T	G	G
control 59			A	A	T	C	C	C	A	A	A	A	C	C	C	C	C	T	G	T	G	G
control 60			0	0	T	T	C	C	C	A	A	A	C	C	T	T	T	T	G	T	G	G
control 61			A	A	T	T	C	C	C	C	G	G	C	C	C	C	C	C	G	T	G	G
control 62			A	C	T	T	C	C	C	C	G	G	C	C	T	C	C	T	G	G	G	G
control 63			A	A	T	T	C	T	C	C	A	A	C	C	T	T	C	C	G	T	G	G
control 64			A	C	T	T	C	T	C	A	G	G	C	C	T	C	C	T	G	T	G	G
control 65			A	A	T	T	C	T	C	A	G	A	C	C	T	C	C	T	G	T	G	A
control 66			A	A	T	T	C	C	C	C	G	A	C	C	T	C	C	C	T	T	G	G
control 67			0	0	0	0	0	0	0	0	0	0	C	C	0	0	C	C	T	T	G	G
control 68			A	A	T	C	C	C	C	A	G	A	C	C	T	C	C	C	G	T	G	G
control 69			A	A	T	T	C	C	C	A	G	A	C	C	T	C	C	T	G	T	G	G
control 70			A	A	T	T	C	C	C	C	G	A	C	C	C	C	C	T	G	T	G	G
control 71			A	C	T	T	C	C	C	C	G	A	C	C	T	C	C	C	T	T	G	G
control 72			A	A	T	C	C	C	C	C	G	G	C	C	T	T	C	T	G	T	G	A
control 73			A	A	T	C	C	C	C	A	G	A	C	C	T	C	T	T	G	T	G	A
control 74			C	C	T	C	C	T	C	A	G	G	C	C	T	C	C	C	T	T	G	G
control 75			A	C	C	C	C	T	C	A	G	A	C	C	C	C	T	T	G	T	G	G
control 76			A	C	T	T	C	C	C	C	G	A	C	C	T	T	C	T	G	T	G	A
control 77			A	A	T	C	C	C	C	C	G	A	C	C	T	C	C	C	G	T	G	G
control 78			A	C	T	T	C	C	C	C	G	A	C	C	T	T	C	T	T	T	G	G
control 79			A	A	T	T	C	C	A	A	G	A	C	C	T	T	C	T	G	T	G	G
control 80			A	A	T	C	C	T	A	A	G	G	C	C	T	C	C	C	G	T	G	G
control 81			A	C	T	C	C	C	C	C	0	0	C	C	T	T	C	C	T	T	G	G
control 82			A	C	T	C	C	C	C	C	G	G	C	C	T	C	C	C	T	T	G	G
control 83			A	C	T	T	C	C	C	C	G	A	C	C	T	C	C	T	G	T	G	G
control 84			A	C	T	C	C	T	C	A	G	G	C	C	T	C	C	T	G	T	G	A
control 85			A	A	T	C	C	C	C	A	G	A	C	C	T	T	C	T	G	G	G	G
control 86			A	C	T	T	T	T	C	A	G	A	C	C	T	C	C	C	G	T	G	G
control 87			A	C	T	T	C	T	C	A	G	G	C	C	T	C	C	C	G	T	G	G
control 88			A	A	T	T	C	T	C	C	A	A	C	C	T	C	C	C	T	T	G	G
control 89			A	A	T	C	C	T	C	C	G	A	C	C	T	T	C	C	T	T	G	G
control 90			A	C	T	T	C	C	C	C	G	G	C	C	T	C	C	T	G	G	G	G
control 91			A	C	T	T	C	C	C	C	G	A	C	C	T	C	C	C	T	T	G	G
control 92			A	C	T	C	C	C	C	C	G	A	C	C	C	C	C	C	G	T	G	G
control 93			C	C	T	C	C	C	C	C	A	A	C	C	C	C	C	C	T	T	G	G
control 94			A	C	T	C	C	C	C	A	A	A	C	C	T	C	C	C	G	T	G	G
control 95			A	A	T	C	C	T	C	C	G	A	C	C	T	C	T	T	G	T	G	A
control 96			A	C	T	C	C	T	C	C	G	A	C	C	T	C	C	T	G	T	G	G
control 97			A	C	C	C	C	C	C	A	G	A	C	C	T	T	C	C	T	T	G	G
control 98			C	C	T	C	0	0	C	C	G	A	C	C	T	T	C	C	T	T	G	G
control 99			A	A	T	T	C	C	C	C	G	G	C	C	T	C	C	T	G	T	G	G
control 100			C	C	T	C	C	C	C	C	G	G	C	C	T	T	C	T	T	T	G	G
control 101			C	C	T	C	C	C	C	C	G	G	C	C	T	T	C	C	T	T	G	G
control 102			0	0	0	0	0	0	0	0	0	0	0	0	0	0	C	C	T	T	G	G
control 103			A	C	T	C	C	T	C	A	A	A	C	T	T	T	T	T	G	T	G	G
control 104			C	C	T	C	C	T	C	C	G	A	C	C	C	C	C	C	T	T	G	G
control 105			C	C	T	C	C	C	C	A	G	G	C	C	T	T	C	C	T	T	G	G
control 106			A	C	T	T	C	C	C	C	G	A	C	C	T	C	C	C	G	G	G	G
control 107			A	A	T	T	C	C	C	C	G	A	C	C	T	T	C	C	G	T	G	G
control 108			A	C	T	C	C	T	C	C	A	A	C	C	T	C	C	T	G	T	G	A
control 109			A	A	T	T	C	C	C	A	G	G	C	C	T	C	T	T	G	G	G	A
control 110			A	A	T	T	C	C	A	A	G	G	C	C	T	T	C	C	0	0	G	G
control 111			A	C	C	C	C	C	C	A	G	A	C	C	T	C	C	T	G	T	G	G
control 112			A	A	C	C	C	C	C	A	G	A	C	C	T	C	C	C	G	T	G	G
control 113			0	0	0	0	0	0	0	0	0	0	0	0	0	0	C	C	G	T	G	G
control 114			A	A	C	C	C	C	C	A	G	A	C	C	T	T	C	C	T	T	G	G
control 115			C	C	T	C	C	C	C	C	G	A	C	C	T	T	C	T	G	G	G	G
control 116			A	A	T	C	C	C	C	C	G	A	C	C	T	C	T	T	G	G	G	A
control 117			A	C	T	T	C	C	C	A	G	A	C	C	T	T	C	T	G	T	G	G
control 118			A	A	T	C	C	T	C	C	G	A	C	C	C	C	C	T	G	T	G	G
control 119			C	C	T	C	C	C	A	A	G	G	C	C	T	T	T	T	G	G	G	G
control 120			A	A	T	C	C	C	C	C	G	G	C	C	T	C	C	C	G	G	G	G
control 121			A	A	C	C	C	C	C	C	G	G	C	C	T	C	C	C	T	T	G	G
control 122			A	C	T	C	C	C	C	A	G	A	C	C	T	C	C	T	G	T	G	G
control 123			A	A	T	C	C	T	C	C	A	A	C	C	T	T	C	C	G	G	G	G
control 124			A	A	T	C	C	T	C	C	G	A	C	C	T	C	C	T	G	T	G	G
control 125			C	C	T	C	C	C	C	C	G	A	C	C	T	C	C	C	G	G	G	G
control 126			0	0	0	0	0	0	A	A	0	0	0	0	0	0	C	T	G	T	G	G
control 127			0	0	0	0	0	0	0	0	0	0	0	0	0	0	C	C	G	T	G	G
control 128			A	C	C	C	C	C	A	A	G	G	C	C	T	C	C	T	G	T	G	G
control 129			A	A	T	C	C	C	C	C	G	G	C	C	T	C	C	C	G	G	G	G
control 130			A	C	T	C	C	T	C	C	A	A	C	C	T	T	C	C	G	T	G	G
control 131			A	C	T	T	C	T	C	C	G	G	C	C	T	C	C	T	G	G	G	G
control 132			C	C	T	T	C	C	C	C	G	A	C	C	T	T	C	T	G	T	G	G
control 133			A	C	T	C	C	T	C	A	G	A	C	C	T	T	C	T	G	T	G	G
control 134			C	C	T	T	C	C	C	C	A	A	C	C	T	C	C	T	G	T	G	G
control 135			A	A	T	C	C	C	A	A	G	A	C	C	T	C	T	T	G	T	G	A
control 136			A	C	T	C	C	C	C	C	G	A	C	C	C	C	C	T	T	T	G	G
control 137			A	C	C	C	C	C	C	C	A	A	C	C	T	C	C	T	T	T	G	G
control 138			A	A	T	C	C	T	C	A	G	G	C	C	C	C	C	C	T	T	G	G
control 139			A	C	C	C	C	T	C	A	G	G	C	C	T	T	C	C	T	T	G	G
control 140			A	A	T	C	C	C	C	C	G	A	C	C	T	C	C	C	0	0	G	G
control 141			0	0	0	0	0	0	0	0	0	0	0	0	0	0	C	C	G	G	G	G
control 142			A	C	T	C	C	C	C	A	G	G	C	C	T	C	C	C	G	G	G	G
control 143			A	C	T	T	C	C	C	C	G	G	C	T	T	C	C	T	G	T	G	G
control 144			A	C	C	C	C	T	C	A	G	G	C	C	T	C	C	C	T	T	G	G
control 145			C	C	T	C	C	C	C	A	G	G	C	C	T	T	C	T	T	T	G	G
control 146			A	C	T	T	C	C	C	A	G	G	C	C	T	C	C	T	G	T	G	G
control 147			C	C	T	T	C	C	C	C	A	A	C	C	C	C	C	T	G	T	G	G
control 148			C	C	T	T	C	C	A	A	G	A	C	C	T	C	C	T	G	T	G	A
control 149			A	C	T	C	C	C	C	A	G	A	C	C	T	C	C	C	T	T	G	G
control 150			0	0	0	0	0	0	A	A	0	0	0	0	0	0	0	0	G	G	G	G
control 151			A	C	T	T	C	T	C	A	G	G	C	C	T	T	C	C	T	T	G	G
control 152			A	C	C	C	C	T	C	A	A	A	C	C	T	C	C	T	G	T	G	G
control 153			C	C	T	C	C	T	C	A	A	A	C	C	C	C	C	C	T	T	G	G
control 154			C	C	C	C	C	C	C	C	A	A	C	T	T	C	T	T	T	T	G	G
control 155			A	A	T	C	C	C	C	A	G	G	C	C	T	T	T	T	G	T	G	G
control 156			A	A	T	C	C	T	C	A	G	A	C	C	C	C	C	T	0	0	G	G
control 157			C	C	T	C	C	T	C	C	G	G	C	C	T	C	C	C	T	T	G	G
control 158			C	C	T	T	0	0	C	A	G	G	C	C	T	C	C	C	T	T	G	G
control 159			A	C	T	T	C	C	C	A	G	A	C	C	T	C	C	T	G	G	G	G
control 160			A	C	T	T	C	C	C	C	G	G	C	C	T	T	C	C	0	0	G	G
control 161			A	A	C	C	C	C	C	C	G	A	C	C	C	C	C	C	G	T	G	G
control 162			A	A	T	C	C	T	C	C	G	A	C	C	T	T	T	T	G	T	G	G
control 163			A	A	T	T	C	C	C	C	G	A	C	C	T	C	C	C	T	T	G	G
control 164			A	C	T	T	C	T	C	C	G	A	C	C	T	C	C	T	G	T	G	G
control 165			A	A	T	T	C	C	C	C	G	G	C	C	T	T	C	T	G	G	G	A
control 166			A	A	T	T	C	C	C	C	A	A	C	C	T	T	T	T	T	T	G	G
control 167			A	A	C	C	C	T	C	C	G	A	C	C	C	C	T	T	0	0	G	A
control 168			A	C	C	C	T	T	C	A	A	A	C	T	T	C	C	T	G	T	G	G
control 169			A	A	T	T	C	T	C	A	G	A	C	C	T	T	C	T	G	T	G	A
control 170			A	A	C	C	C	T	C	A	A	A	C	C	T	C	C	T	G	T	G	G
control 171			A	A	T	C	C	C	C	C	G	A	C	C	T	T	C	C	T	T	G	G
control 172			A	A	T	C	C	T	C	A	A	A	C	C	T	C	T	T	G	G	G	G
control 173			A	A	T	T	C	C	C	C	A	A	C	C	T	C	C	C	T	T	G	G
control 174			A	C	T	T	C	T	C	C	G	A	C	C	T	T	C	T	G	T	G	G
control 175			0	0	T	T	C	T	C	C	G	A	C	C	C	C	T	T	0	0	G	G
control 176			A	A	T	T	C	C	C	C	G	G	C	C	T	C	C	T	T	T	G	G
control 177			A	A	T	C	C	C	C	C	G	G	C	C	T	C	C	C	G	T	G	G
control 178			A	A	T	C	C	C	C	A	G	G	C	C	C	C	C	T	0	0	G	A
control 179			A	C	T	C	C	T	C	C	G	A	C	C	T	C	C	T	0	0	G	G
control 180			A	A	T	C	C	T	C	A	G	A	C	C	T	T	C	T	G	G	G	G
control 181			A	C	T	C	C	C	C	C	A	A	C	C	T	T	C	T	G	T	G	A
control 182			A	A	T	C	C	C	C	A	G	G	C	C	C	C	C	T	G	G	G	G
control 183			A	A	T	C	C	C	C	A	G	A	C	C	T	C	C	C	G	G	G	G
control 184			A	A	T	C	C	C	C	C	A	A	C	C	T	T	C	T	0	0	G	G
control 185			A	C	T	T	C	C	C	C	G	A	C	C	T	C	C	C	T	T	G	G
control 186			A	C	T	C	C	C	C	C	A	A	C	C	T	C	T	T	G	T	G	G
control 187			A	A	T	C	C	C	C	C	G	A	C	C	T	C	C	C	0	0	G	G
control 188			0	0	T	C	C	C	C	C	G	A	C	C	T	T	C	C	G	T	G	G
control 189			C	C	T	C	C	T	C	A	G	A	C	C	C	C	T	T	T	G	G	G
control 190			A	C	T	T	C	C	C	C	G	A	C	C	T	T	C	T	T	G	G	A
control 191			A	A	T	T	C	C	C	C	G	A	C	C	T	T	C	C	T	T	G	G
control 192			C	C	T	C	C	C	C	C	A	A	C	C	T	T	C	T	T	G	G	G
control 193			A	C	T	T	C	T	C	C	G	G	C	C	T	T	C	T	T	G	G	G
control 194			A	C	T	C	C	C	C	C	A	A	C	C	T	T	0	0	T	G	0	0
control 195			A	C	T	T	C	T	C	A	G	A	C	C	T	T	0	0	G	G	0	0
control 196			A	C	T	T	C	C	C	C	G	A	C	C	T	C	C	T	T	G	G	G
control 197			A	A	T	T	C	T	C	C	A	A	C	C	T	C	C	T	T	G	G	A
control 198			A	C	T	T	C	T	C	A	G	A	C	C	T	C	C	C	T	T	G	G
control 199			A	A	T	T	C	T	C	C	G	A	C	C	T	C	C	C	T	T	G	G
control 200			A	C	T	C	C	T	C	C	G	A	C	C	T	T	T	T	T	G	G	G
control 201			A	A	T	C	C	T	C	A	G	G	C	C	T	C	C	T	G	G	G	A
control 202			A	C	T	C	C	C	C	C	G	A	C	C	T	C	C	T	T	G	G	G
control 203			A	C	T	T	C	T	C	C	G	A	C	C	C	C	C	C	T	G	G	G
control 204			A	C	T	C	T	T	C	A	G	A	C	C	T	T	C	C	T	T	G	G
control 205			A	A	T	T	C	C	C	A	G	A	C	C	T	C	C	C	T	G	G	G
control 206			A	A	T	C	C	C	C	C	G	A	C	C	C	C	C	C	T	T	G	G
control 207			A	C	T	C	C	C	C	C	A	A	C	C	T	T	C	C	T	G	G	G
control 208			A	C	C	C	C	C	A	A	G	G	C	C	T	C	C	T	T	G	G	A
control 209			A	A	T	T	C	C	C	C	G	A	C	C	T	T	C	C	T	G	G	G
control 210			A	A	T	T	C	C	C	A	A	A	C	T	T	C	T	T	G	G	G	G
control 211			A	A	T	C	C	T	C	C	G	G	C	C	C	C	C	C	T	T	G	G
control 212			A	C	T	T	C	C	C	A	G	A	C	C	T	T	C	T	T	T	G	G
control 213			A	A	T	C	C	C	C	C	G	A	C	C	T	T	C	T	T	T	G	G
control 214			A	C	T	T	C	T	C	C	G	G	C	C	T	T	C	C	T	G	G	G
control 215			A	C	T	T	C	C	C	A	G	A	C	C	T	T	T	T	G	G	G	G
control 216			A	C	T	T	C	T	C	A	G	A	C	C	T	T	C	C	T	G	G	G
control 217			A	C	T	C	T	T	C	A	A	A	C	C	C	C	C	C	T	T	G	G
control 218			A	C	T	C	C	C	C	C	G	G	C	C	C	C	C	T	G	G	G	G
control 219			A	A	T	C	C	C	C	A	G	G	C	C	T	T	C	T	T	G	G	G
control 220			A	C	T	T	C	C	C	C	A	A	C	C	T	T	0	0	G	G	G	A
control 221			A	C	T	C	C	C	A	A	G	G	C	C	T	T	C	T	T	G	G	G
control 222			A	C	T	T	C	C	C	A	G	A	C	C	T	T	T	T	T	G	G	G
control 223			A	C	C	C	C	C	C	C	G	G	C	C	C	C	C	C	T	T	G	G
control 224			A	C	T	C	C	C	C	A	G	G	C	C	T	T	C	T	T	T	G	G
control 225			A	C	T	T	C	C	C	A	A	A	C	C	T	C	C	C	T	T	G	G
control 226			A	A	T	T	C	C	C	C	G	A	C	C	T	C	C	C	T	T	G	G
control 227			A	C	T	C	C	T	C	A	G	A	C	C	T	C	C	C	T	G	G	G
control 228			A	C	T	T	C	C	C	A	A	A	C	C	T	C	C	C	T	T	G	G
control 229			A	C	T	T	C	T	C	A	G	A	C	C	T	C	C	C	T	T	G	G
control 230			A	A	T	C	C	C	C	A	G	G	C	C	T	C	C	C	T	G	G	G
control 231			A	A	T	T	C	T	C	A	A	A	C	C	T	T	C	T	T	G	G	G
control 232			C	C	T	T	C	T	C	A	G	A	C	C	T	C	T	T	G	G	G	G
control 233			A	A	T	C	C	C	C	A	G	G	C	C	C	C	C	T	T	G	G	A
control 234			A	A	T	C	C	T	C	A	A	A	C	C	T	T	C	T	T	G	G	G
control 235			A	C	T	T	C	C	C	C	0	0	C	C	T	T	T	T	T	G	G	A
control 236			C	C	T	T	C	C	C	A	G	A	C	C	T	C	C	T	T	T	G	G
control 237			A	A	T	T	C	C	C	A	G	G	C	C	T	C	T	T	T	T	G	G
control 238			A	A	T	C	C	C	C	C	G	G	C	C	C	C	C	T	T	G	G	G
control 239			A	A	T	T	C	C	C	C	G	A	C	C	T	C	C	T	T	G	G	A
control 240			A	A	T	T	C	C	C	A	G	G	C	C	T	T	C	T	T	G	G	G
control 241			A	A	T	T	C	C	C	A	G	A	C	C	T	T	C	T	G	G	G	G
control 242			C	C	T	T	T	T	C	C	G	A	C	C	T	C	T	T	G	G	G	A
control 243			A	A	T	C	C	C	C	C	G	A	C	C	C	C	C	C	G	G	G	G
control 244			A	A	T	C	C	C	C	A	G	G	C	C	T	T	C	C	T	T	G	G
control 245			A	C	T	C	C	C	C	C	G	G	C	C	T	T	C	T	T	G	G	G
control 246			A	C	T	C	C	T	C	C	A	A	C	C	C	C	T	T	T	G	G	G
control 247			A	A	T	C	C	C	C	C	A	A	C	C	T	T	C	C	T	G	G	G
control 248			A	C	T	T	C	T	C	A	G	G	C	C	T	T	C	T	T	G	G	G
control 249			A	A	T	T	C	T	C	A	A	A	C	C	T	T	C	C	T	G	G	G
control 250			A	A	T	T	C	C	C	A	G	G	C	C	T	C	C	T	T	T	G	G
control 251			C	C	T	T	C	T	C	C	G	A	C	C	T	C	C	T	T	G	G	G
control 252			A	C	T	T	C	C	C	A	A	A	C	C	T	T	C	T	T	G	G	G
control 253			A	A	T	C	C	C	C	A	G	G	C	C	T	C	C	C	T	T	G	G
control 254			A	A	T	T	C	T	C	C	G	G	C	C	T	C	C	C	T	T	G	G
control 255			0	0	0	0	C	C	0	0	0	0	C	C	0	0	C	C	T	G	G	G
control 256			A	A	T	T	C	C	C	A	G	G	C	C	T	C	C	T	T	G	G	G
control 257			A	C	T	T	C	C	A	A	G	A	C	C	T	C	C	T	G	G	G	G
control 258			A	A	T	T	C	C	C	A	G	A	C	C	T	T	C	T	T	G	G	G
control 259			A	A	T	T	C	C	C	C	G	G	C	C	T	T	C	C	T	G	G	G
control 260			A	A	T	T	C	C	C	C	G	A	C	C	T	T	C	C	T	G	G	G
control 261			C	C	T	T	C	C	C	A	A	A	C	C	T	C	T	T	T	G	G	G
control 262			C	C	T	C	C	C	C	A	G	G	C	C	C	C	C	C	G	G	G	G
control 263			A	A	T	C	C	T	C	A	A	A	C	C	T	C	C	C	T	T	G	G
control 264			A	A	T	T	C	C	C	A	G	A	C	C	T	T	C	C	T	T	G	G
control 265			A	C	T	C	C	C	A	A	G	G	C	C	T	C	C	T	T	G	G	G
control 266			C	C	T	C	C	T	C	A	A	A	C	C	T	T	C	C	T	G	G	G
control 267			A	C	T	C	C	C	C	C	G	G	C	C	T	C	C	C	T	T	G	G
control 268			A	A	T	T	C	C	C	C	G	A	C	C	C	C	C	T	T	G	G	A
control 269			A	A	T	C	C	C	C	A	G	G	C	C	T	C	C	T	T	G	G	G
control 270			A	C	T	T	C	C	C	A	G	G	C	C	T	T	C	C	T	T	G	G
control 271			A	A	T	C	C	C	A	A	G	G	C	C	T	T	C	C	T	T	G	G
control 272			C	C	T	C	C	C	C	A	G	A	C	T	T	C	C	T	T	T	G	G
control 273			A	A	T	T	C	C	C	A	G	A	C	C	T	T	C	C	T	T	G	G
control 274			0	0	T	T	C	C	C	A	0	0	0	0	T	C	C	C	T	T	G	G
control 275			A	C	T	C	C	T	C	A	G	G	C	C	C	C	C	T	T	T	G	G
control 276			A	A	T	C	C	T	C	A	G	A	C	C	T	C	T	T	G	G	G	G
control 277			A	C	T	C	C	T	C	C	G	G	C	C	C	C	C	T	0	0	G	A
control 278			A	A	T	T	C	C	C	A	G	A	C	C	T	C	C	C	T	T	G	G
control 279			A	C	T	C	C	C	C	C	A	A	C	C	T	C	C	T	T	G	G	A
control 280			A	C	T	T	C	T	A	A	G	A	C	C	T	T	C	C	0	0	G	G
control 281			A	C	T	T	C	T	C	A	A	A	C	C	T	C	T	T	G	G	G	G
control 282			A	A	T	T	C	C	C	C	A	A	0	0	C	C	C	C	T	T	G	G
control 283			A	A	T	T	C	C	C	C	G	A	C	C	T	C	C	C	T	T	G	G
control 284			A	A	T	T	C	C	C	A	G	A	C	C	T	T	C	T	T	G	G	G
control 285			A	A	T	T	C	T	C	C	A	A	C	C	C	C	C	C	T	G	G	G
control 286			A	C	T	C	C	C	C	C	G	A	C	C	T	T	C	T	T	G	G	G
control 287			A	A	T	T	C	C	C	A	A	A	C	C	T	C	C	T	T	T	G	G
control 288			0	0	0	0	C	C	0	0	0	0	C	C	0	0	C	C	0	0	G	G
control 289			A	A	T	T	C	C	C	A	G	G	C	C	T	C	T	T	G	G	G	A
control 290			A	A	T	T	C	T	C	A	A	A	C	C	T	C	T	T	0	0	G	A
control 291			0	0	0	0	C	C	0	0	0	0	C	C	T	T	C	T	0	0	G	G
control 292			0	0	0	0	0	0	0	0	0	0	0	0	0	0	C	C	0	0	G	G
control 293			A	A	T	T	C	C	C	C	G	G	C	C	T	T	C	C	T	T	G	G
control 294			0	0	0	0	0	0	0	0	0	0	0	0	0	0	T	T	0	0	A	A
control 295			A	C	T	C	C	T	C	C	G	A	C	C	T	T	C	T	T	G	G	A
control 296			A	A	T	T	C	C	C	A	G	G	C	C	T	T	C	T	G	G	G	G
control 297			A	C	T	C	C	C	C	C	G	G	C	C	T	T	C	C	T	T	G	G
control 298			A	A	T	C	C	T	C	A	G	A	C	C	C	C	C	C	T	G	G	G
control 299			0	0	0	0	0	0	0	0	0	0	C	C	0	0	C	C	0	0	G	G
control 300			0	0	0	0	C	T	0	0	0	0	C	C	0	0	C	T	0	0	G	G
control 301			C	C	T	C	T	T	C	C	G	G	C	C	T	C	C	T	T	G	G	G
control 302			A	C	T	T	C	T	C	C	G	G	C	C	T	T	C	C	T	T	G	G
control 303			A	C	T	C	C	C	C	A	A	A	C	C	C	C	C	T	G	G	G	G
control 304			A	C	T	T	C	C	C	C	G	A	C	C	T	C	C	C	T	T	G	G
control 305			0	0	0	0	0	0	0	0	0	0	0	0	T	T	C	T	0	0	G	G
control 306			A	C	T	T	C	C	C	A	G	A	C	C	C	C	C	C	T	G	G	G
control 307			0	0	0	0	0	0	0	0	0	0	C	C	0	0	C	C	0	0	G	G
control 308			A	C	T	C	C	C	C	C	G	A	C	C	C	C	C	T	T	G	G	G
control 309			A	C	T	T	C	T	C	C	G	A	C	C	T	T	T	T	T	G	G	G
control 310			A	A	T	T	C	T	C	A	G	A	C	C	C	C	C	T	T	G	G	G
control 311			A	C	T	T	C	T	C	C	A	A	C	C	T	C	T	T	T	G	G	G
control 312			C	C	T	C	C	C	C	C	G	A	C	C	T	C	C	T	T	G	G	G
control 313			A	A	C	C	C	T	C	A	G	A	C	C	T	T	C	T	T	G	G	G
control 314			A	A	T	T	C	T	C	A	G	A	C	C	C	C	C	T	T	G	G	G
control 315			A	C	T	C	C	C	A	A	A	A	C	C	C	C	C	T	T	G	G	G
control 316			0	0	T	C	C	C	C	A	G	G	C	C	T	C	C	C	T	G	G	G
control 317			A	A	T	C	C	C	C	C	G	G	C	C	T	C	C	T	T	G	G	G
control 318			A	A	T	C	C	C	C	C	G	G	C	C	T	C	C	T	T	G	G	G
control 319			A	A	T	T	C	C	C	C	G	A	C	C	T	C	T	T	T	G	G	G
control 320			A	A	C	C	C	C	C	C	G	A	C	T	C	C	C	C	T	G	G	G
control 321			A	A	T	T	C	T	C	A	G	A	C	C	T	T	C	C	T	G	G	G
control 322			A	C	T	T	C	T	C	C	G	A	C	C	T	C	C	T	T	T	G	G
control 323			A	C	T	C	C	C	C	C	G	A	C	C	T	C	C	T	T	G	G	G
control 324			A	C	T	T	C	C	C	A	G	A	C	C	T	C	C	T	T	G	G	G
control 325			A	C	T	T	C	T	C	C	A	A	C	C	T	T	C	C	T	T	G	G
control 326			A	C	C	C	C	T	C	C	G	G	C	C	T	T	C	C	T	T	G	G
control 327			A	C	T	T	C	C	C	A	A	A	C	C	T	T	C	C	T	G	G	G
control 328			C	C	T	T	T	T	C	A	G	A	C	C	T	C	T	T	T	G	G	G
control 329			0	0	0	0	0	0	0	0	0	0	C	C	0	0	C	T	0	0	G	G
control 330			A	C	T	T	C	T	C	C	G	G	C	C	T	T	C	C	T	G	G	G
control 331			0	0	T	T	C	C	0	0	0	0	C	C	T	T	C	C	0	0	G	G
control 332			A	A	C	C	C	C	C	C	G	G	C	C	C	C	C	T	T	G	G	A
control 333			A	A	T	C	C	T	C	C	G	A	C	C	T	C	T	T	T	T	G	G
control 334			0	0	0	0	0	0	0	0	0	0	C	C	T	T	C	C	T	T	G	G
control 335			A	C	T	C	C	C	C	C	G	A	C	C	C	C	C	C	T	T	G	G
control 336			A	A	T	C	C	C	C	A	A	A	C	C	T	C	C	T	T	G	G	G
control 337			0	0	T	T	0	0	0	0	0	0	C	C	T	C	C	T	0	0	G	G
control 338			0	0	0	0	C	C	0	0	0	0	0	0	T	T	T	T	0	0	G	A
control 339			0	0	0	0	C	C	0	0	0	0	C	C	0	0	C	C	0	0	G	G
control 340			0	0	0	0	0	0	0	0	0	0	C	C	T	C	C	T	0	0	G	G
control 341			A	A	T	T	C	T	C	A	G	A	C	C	C	C	C	T	T	G	G	G
control 342			A	C	T	C	C	T	C	C	G	A	C	C	T	T	C	C	T	G	G	G
control 343			C	C	T	T	C	C	C	A	A	A	C	C	T	T	C	C	T	T	G	G
control 344			0	0	T	T	0	0	0	0	0	0	C	C	T	T	C	C	0	0	G	G
control 345			A	A	T	T	T	T	A	A	G	G	C	C	T	C	C	C	T	G	G	G
control 346			A	C	T	C	C	C	C	C	G	A	C	C	C	C	C	C	T	T	G	G
control 347			A	C	C	C	C	T	A	A	A	A	C	C	T	T	C	T	T	G	G	A
control 348			A	A	T	T	C	T	C	C	A	A	C	C	C	C	T	T	T	G	G	G
control 349			A	A	T	C	C	C	C	C	G	A	C	C	T	C	C	T	T	T	G	G
control 350			A	C	T	C	C	C	C	A	0	0	C	C	C	C	C	C	T	T	G	G
control 351			A	C	T	C	C	T	C	C	G	A	C	C	T	C	C	T	T	G	G	G
control 352			0	0	T	T	C	C	C	C	G	A	C	C	T	T	C	C	T	G	G	G
control 353			A	C	T	C	C	C	C	A	G	A	C	C	T	C	C	T	T	T	G	G
control 354			A	C	T	C	C	T	C	A	G	A	C	C	T	T	C	C	T	G	G	G
control 355			A	A	C	C	C	C	C	A	A	A	C	C	T	C	C	C	T	G	G	G
control 356			A	A	T	C	C	C	C	A	A	A	C	C	T	C	C	T	T	G	G	G
control 357			A	A	T	T	C	C	C	A	G	A	C	C	T	C	C	C	T	T	G	G
control 358			A	A	T	T	C	C	C	C	G	G	C	T	C	C	C	C	T	G	G	G
control 359			A	C	T	T	C	C	C	A	G	A	C	C	T	T	C	T	G	G	G	G
control 360			A	C	T	T	C	C	C	A	G	G	C	C	T	C	C	C	T	G	G	G
control 361			0	0	0	0	C	C	0	0	0	0	C	C	T	C	0	0	0	0	G	G
control 362			A	A	T	T	C	C	C	A	A	A	C	C	T	T	C	C	T	T	G	G
control 363			0	0	0	0	0	0	0	0	0	0	C	C	0	0	0	0	0	0	G	G
control 364			A	C	T	C	T	T	C	A	G	G	C	C	C	C	C	T	G	G	G	G
control 365			A	A	T	T	C	T	A	A	G	G	C	C	T	C	C	C	T	G	G	G
control 366			A	A	T	C	C	C	C	A	G	A	C	C	T	C	C	C	T	G	G	G
control 367			C	C	T	C	0	0	C	C	A	A	C	C	C	C	C	C	T	G	G	G
control 368			C	C	T	T	C	C	A	A	G	A	C	C	T	T	C	C	T	G	G	G
control 369			0	0	T	T	C	C	C	C	0	0	C	C	0	0	C	T	0	0	G	G
control 370			A	C	T	T	0	0	C	C	A	A	C	C	T	C	T	T	T	G	G	A
control 371			A	C	T	C	C	C	C	C	G	G	C	C	T	T	C	T	T	T	G	A
control 372			C	C	T	T	0	0	C	C	A	A	C	C	T	C	C	C	T	G	G	G
control 373			A	A	T	C	C	C	C	A	G	G	C	C	T	C	C	T	T	T	G	G
control 374			A	A	T	C	0	0	C	C	G	A	C	C	T	C	C	T	T	G	G	G
control 375			A	C	T	T	0	0	A	A	G	G	C	C	C	C	C	T	G	G	G	G
control 376			0	0	T	T	0	0	0	0	0	0	C	C	0	0	C	T	0	0	G	G
control 377			A	C	T	C	0	0	C	C	A	A	C	C	T	C	C	T	T	G	G	G
control 378			C	C	T	T	0	0	C	C	G	A	C	C	T	C	C	T	G	G	G	G
control 379			0	0	0	0	C	C	0	0	0	0	C	C	0	0	0	0	0	0	G	G
control 380			A	C	T	T	C	C	C	A	A	A	C	C	T	C	C	T	G	T	G	G
control 381			A	A	T	C	C	T	C	A	G	A	C	C	T	T	C	T	T	T	G	G
control 382			A	C	T	C	C	T	C	C	G	A	C	C	T	T	C	T	T	T	G	G
control 383			A	C	T	C	C	T	C	C	G	A	C	C	T	T	C	T	G	T	G	G
control 384			A	C	T	C	C	T	C	C	G	A	C	C	T	C	C	T	G	G	G	G
control 385			A	C	T	C	C	C	A	A	G	A	C	C	T	C	C	T	G	G	G	A
control 386			A	A	T	C	C	C	C	A	G	G	C	C	T	C	C	C	T	T	G	G
control 387			A	A	T	C	C	T	C	C	G	A	C	C	T	C	C	T	0	0	G	G
control 388			A	A	T	C	C	C	C	A	A	A	C	C	C	C	T	T	G	T	G	G
control 389			A	C	T	T	C	C	A	A	G	A	C	C	T	C	C	T	G	T	G	G
control 390			A	A	T	T	C	T	A	A	G	A	C	C	T	C	C	C	G	T	G	G
control 391			A	C	T	T	C	C	C	A	A	A	C	C	T	C	C	C	T	T	G	G
control 392			C	C	T	C	C	C	C	C	G	A	C	C	C	C	C	T	G	T	G	A
control 393			0	0	0	0	C	C	C	C	0	0	C	C	0	0	C	T	G	T	G	A
control 394			A	A	T	T	C	T	C	C	G	A	C	C	C	C	C	T	G	T	G	A
control 395			C	C	T	C	T	T	C	C	A	A	C	T	C	C	C	T	G	T	G	G
control 396			A	A	T	T	C	C	C	C	G	A	C	T	T	C	C	T	G	G	G	G
control 397			0	0	T	T	C	C	C	C	G	G	C	C	T	T	C	C	G	T	G	G
control 398			A	C	T	T	C	T	C	C	G	A	C	C	C	C	T	T	T	T	G	G
control 399			A	C	T	T	C	T	C	C	0	0	C	C	0	0	C	T	G	T	G	G
control 400			A	A	T	T	C	T	C	C	G	A	C	C	T	T	C	T	G	G	G	A
control 401			A	A	T	C	C	C	A	A	G	G	C	C	T	T	C	C	G	G	G	G
control 402			A	C	T	C	C	C	C	A	A	A	C	C	T	C	T	T	G	T	G	G
control 403			A	A	C	C	C	C	C	A	G	A	C	C	T	T	C	T	G	T	G	G
control 404			A	C	T	T	C	C	C	A	G	A	C	C	T	C	C	C	G	T	G	G
control 405			A	C	T	T	C	C	C	C	G	A	C	C	T	T	C	T	G	G	G	G
control 406			0	0	0	0	0	0	0	0	0	0	0	0	0	0	C	C	T	T	G	G
control 407			A	C	T	C	C	C	C	A	G	G	C	C	C	C	C	T	G	T	G	G
control 408			A	A	T	C	C	T	C	C	G	A	C	C	T	T	C	C	G	T	G	G
control 409			0	0	T	T	C	C	C	A	G	A	C	C	T	T	C	C	G	T	G	G
control 410			0	0	0	0	C	C	0	0	0	0	C	C	0	0	T	T	G	G	G	G
control 411			A	A	T	T	C	C	C	C	G	G	C	C	T	C	0	0	0	0	G	G
control 412			A	A	T	C	C	C	C	C	G	A	C	C	T	T	C	C	G	T	G	G
control 413			0	0	0	0	C	C	0	0	0	0	0	0	0	0	C	C	T	T	G	G
control 414			A	A	T	T	C	C	C	A	0	0	C	C	T	T	0	0	T	T	G	G
control 415			0	0	0	0	C	C	0	0	0	0	C	C	0	0	C	T	G	T	G	G
control 416			0	0	0	0	C	C	0	0	0	0	C	C	0	0	C	C	T	T	G	G
control 417			A	C	T	T	C	C	C	C	G	A	C	C	T	C	C	C	T	T	G	G
control 418			A	A	T	T	C	T	C	A	G	A	0	0	C	C	C	T	G	T	G	G
control 419			0	0	0	0	0	0	0	0	0	0	0	0	0	0	C	C	T	T	G	G
control 420			A	C	T	T	C	C	C	A	A	A	C	C	T	C	C	C	T	T	G	G
control 421			0	0	0	0	C	C	0	0	0	0	C	C	0	0	C	C	G	T	G	G
control 422			A	C	C	C	C	C	C	C	A	A	C	C	T	C	C	C	T	T	G	G
control 423			0	0	0	0	C	C	0	0	0	0	C	C	0	0	C	C	G	T	G	G
control 424			A	C	T	C	C	C	C	C	A	A	C	C	T	T	C	T	G	T	G	G
control 425			A	A	T	T	C	T	C	A	G	A	C	C	T	C	C	C	G	T	G	G
control 426			A	A	T	T	C	T	C	C	G	A	C	C	T	T	C	C	G	G	G	G
control 427			0	0	0	0	0	0	0	0	0	0	C	C	0	0	C	T	G	G	G	G
control 428			A	C	C	C	C	T	C	C	G	A	C	C	C	C	C	C	T	T	G	G
control 429			0	0	T	C	C	T	C	C	G	G	C	C	C	C	C	T	G	G	G	G
control 430			A	A	T	T	C	C	C	C	G	A	C	C	T	T	0	0	0	0	G	G
control 431			A	A	T	C	C	C	C	A	G	A	C	C	T	C	C	C	T	T	G	G
control 432			A	A	T	C	T	T	A	A	G	A	C	C	T	T	C	C	G	T	G	G
control 433			A	A	T	T	C	T	C	C	0	0	C	C	T	T	C	T	G	T	G	G
control 434			A	A	C	C	C	C	C	C	G	A	C	C	T	T	C	T	G	G	G	A
control 435			C	C	0	0	C	C	C	A	G	G	C	C	T	T	T	T	G	T	G	A
control 436			0	0	0	0	C	C	0	0	0	0	C	C	0	0	C	T	G	T	G	G
control 437			0	0	0	0	C	T	0	0	0	0	C	C	0	0	C	T	T	T	G	G
control 438			0	0	0	0	C	T	0	0	0	0	C	C	0	0	C	C	G	G	G	G
control 439			A	C	T	T	C	T	C	C	G	A	C	C	T	T	C	T	G	G	G	G
control 440			A	C	C	C	C	T	C	C	G	A	C	C	C	C	C	C	T	T	G	G
control 441			A	C	T	C	C	T	C	A	G	A	C	C	C	C	C	C	0	0	G	G
control 442			A	C	C	C	C	C	A	A	A	A	C	C	T	C	C	T	G	T	G	G
control 443			A	A	T	C	C	T	C	C	G	A	C	C	T	C	C	T	G	T	G	A
control 444			0	0	0	0	C	C	0	0	0	0	0	0	0	0	C	C	T	T	G	G
control 445			A	A	T	C	C	C	A	A	G	A	C	C	T	C	C	T	T	T	G	G
control 446			A	C	T	T	C	T	C	A	G	A	C	C	T	C	C	T	G	T	G	G
control 447			C	C	T	T	C	C	C	C	A	A	C	C	T	T	C	C	T	T	G	G
control 448			A	A	T	T	C	C	C	A	A	A	C	C	T	T	C	T	T	T	G	G
control 449			A	A	T	T	C	T	A	A	A	A	C	C	T	C	C	T	G	T	G	A
control 450			A	A	T	T	C	T	C	C	A	A	C	C	T	T	C	T	G	T	G	G
control 451			A	C	T	T	C	C	C	C	G	G	C	C	C	C	C	C	G	T	G	G
control 452			A	C	C	C	C	C	C	A	G	A	C	C	T	C	C	C	T	T	G	G
control 453			A	C	T	T	C	T	C	C	A	A	C	C	T	C	C	T	G	T	G	G
control 454			A	A	T	C	C	C	C	C	G	A	C	C	C	C	C	C	G	G	G	G
control 455			A	C	T	C	T	T	C	A	G	G	C	T	C	C	C	T	T	T	G	G
control 456			C	C	T	C	C	T	C	A	A	A	C	C	C	C	C	C	G	T	G	G
control 457			A	A	C	C	C	C	C	C	A	A	C	C	C	C	C	T	G	T	G	A
control 458			A	C	T	C	C	C	C	A	G	G	C	C	T	T	C	T	T	T	G	G
control 459			A	A	T	C	C	C	C	C	A	A	C	C	T	C	C	C	T	T	G	G
control 460			A	C	C	C	C	T	C	A	G	A	C	C	T	T	C	T	T	T	G	G
control 461			A	C	T	T	C	C	C	C	G	G	C	C	T	C	C	C	T	T	G	G
control 462			A	A	C	C	C	T	C	C	G	A	C	C	T	C	T	T	G	T	G	G
control 463			A	C	T	C	C	C	C	C	A	A	C	C	T	T	C	C	T	T	G	G
control 464			A	A	T	C	C	C	C	A	G	A	C	C	T	T	C	C	G	T	G	G
control 465			0	0	0	0	0	0	0	0	0	0	0	0	0	0	0	0	0	0	G	G
control 466			A	C	T	T	T	T	C	A	G	A	C	C	T	C	C	T	G	G	G	A
control 467			A	A	T	T	C	T	C	C	A	A	C	C	T	C	C	C	G	T	G	G
control 468			A	C	T	T	C	T	C	A	G	A	C	C	T	C	C	C	T	T	G	G
control 469			A	A	T	C	C	T	C	C	G	G	C	C	T	T	T	T	G	G	G	A
control 470			A	C	T	T	C	C	C	C	G	A	C	C	C	C	C	T	T	T	G	G
control 471			A	A	T	C	C	T	C	C	A	A	C	C	T	C	C	C	T	T	G	G
control 472			A	C	T	C	C	T	C	C	G	A	C	C	C	C	C	C	T	T	G	G
control 473			A	C	T	T	C	C	C	C	G	G	C	C	T	C	C	T	G	G	G	A
control 474			A	C	T	T	C	C	C	C	G	A	C	C	T	C	C	T	T	G	G	G
control 475			0	0	0	0	C	C	0	0	0	0	C	C	0	0	C	C	0	0	G	G
control 476			0	0	0	0	0	0	0	0	0	0	0	0	0	0	T	T	0	0	G	G
control 477			A	C	T	T	T	T	C	A	G	G	C	C	T	C	C	T	T	G	G	A
control 478			A	C	T	T	C	C	C	A	G	G	C	C	T	C	C	T	T	G	G	G
control 479			A	A	T	T	C	T	C	A	G	A	C	C	T	C	C	C	G	G	G	G
control 480			A	C	T	T	C	C	C	C	G	G	C	C	T	T	C	T	T	G	G	G
control 481			A	C	T	C	C	C	C	C	A	A	C	C	T	T	T	T	T	G	G	G
control 482			A	C	T	C	C	T	C	A	G	A	C	C	T	C	C	T	G	G	G	A
control 483			A	C	T	T	C	C	C	C	A	A	C	C	T	T	C	C	T	T	G	G
control 484			A	A	T	C	C	C	C	C	G	G	C	C	T	T	T	T	G	G	G	G
control 485			A	A	T	T	C	T	C	A	A	A	C	C	T	C	C	T	T	G	G	G
control 486			A	A	T	C	C	C	C	A	G	G	C	C	T	T	C	T	T	G	G	G
control 487			A	C	T	T	C	T	C	C	A	A	C	C	T	T	C	T	T	G	G	G
control 488			C	C	T	T	C	T	C	C	G	A	C	C	C	C	T	T	G	G	G	A
control 489			A	C	T	T	C	T	C	C	G	G	C	C	T	C	C	T	T	G	G	G
control 490			A	C	T	T	C	C	A	A	G	A	C	C	T	C	C	T	T	G	G	G
control 491			A	C	T	T	C	T	C	C	G	A	C	C	C	C	C	T	T	G	G	G
control 492			C	C	T	C	C	C	C	A	G	A	C	C	T	C	C	T	G	G	G	G
control 493			C	C	T	C	C	C	C	A	G	A	C	C	C	C	C	C	G	G	G	G
control 494			A	C	T	T	C	T	C	A	G	A	C	C	T	T	C	T	T	G	G	G
control 495			0	0	T	C	C	C	C	C	G	A	C	C	T	T	C	C	T	G	G	G
control 496			A	A	T	T	C	T	C	C	G	A	C	C	T	T	C	T	T	G	G	G
control 497			A	C	T	C	C	T	C	A	G	G	C	C	C	C	C	T	T	T	G	G
control 498			A	A	T	T	C	C	C	A	A	A	C	C	C	C	C	C	T	T	G	G
control 499			C	C	T	C	C	C	C	A	G	G	C	C	T	T	C	C	T	G	G	G
control 500			A	C	C	C	C	T	C	A	G	A	C	C	T	C	C	T	T	G	G	A
control 501			A	C	T	C	C	C	A	A	0	0	C	C	C	C	C	T	G	G	G	G
control 502			A	C	T	T	C	C	C	C	A	A	C	C	T	C	C	C	G	G	G	G
control 503			A	A	T	C	C	C	C	A	G	A	C	C	T	T	C	T	T	G	G	G
control 504			A	C	T	T	C	T	C	C	G	A	T	T	T	T	C	T	T	G	G	G
control 505			A	C	T	C	C	T	C	C	A	A	C	C	T	C	C	C	T	G	G	G
control 506			A	C	T	T	T	T	C	C	A	A	C	C	T	C	C	T	G	G	G	G
control 507			A	C	T	T	C	C	C	C	G	A	C	C	T	C	C	T	T	T	G	G
control 508			A	C	T	C	C	C	C	C	G	A	C	C	T	C	C	T	G	G	G	G
control 509			A	C	T	T	C	C	C	A	G	G	C	C	T	T	C	C	T	T	G	G
control 510			A	C	C	C	C	T	C	C	G	G	C	C	T	T	C	C	T	T	G	G
control 511			A	A	T	T	C	T	C	A	G	G	C	C	T	C	C	T	T	G	G	G
control 512			A	C	T	T	C	C	C	C	G	A	C	C	C	C	C	C	T	T	G	G
control 513			A	C	T	T	C	C	C	C	G	A	C	C	T	C	C	C	T	G	G	G
control 514			A	C	T	T	C	C	C	A	A	A	C	C	C	C	C	C	T	G	G	G
control 515			A	C	T	T	C	T	C	A	G	G	C	T	T	C	T	T	G	G	G	A
control 516			A	A	T	C	C	C	C	C	G	A	C	C	C	C	C	C	T	G	G	G
control 517			A	C	T	T	C	C	C	C	G	G	C	C	T	T	C	T	T	G	G	A
control 518			A	C	T	C	C	C	C	A	G	G	C	C	C	C	C	T	G	G	G	A
control 519			A	C	T	C	C	C	0	0	G	A	C	C	C	C	C	C	T	T	G	G
control 520			A	A	T	C	C	C	C	C	G	A	C	C	C	C	T	T	G	G	G	A
control 521			A	C	T	C	C	C	C	A	G	G	C	C	T	T	C	T	T	T	G	G
control 522			A	C	T	T	C	C	C	A	G	A	C	C	T	T	T	T	G	G	G	G
control 523			0	0	T	T	C	C	C	C	G	A	C	C	T	C	C	T	T	G	G	G
control 524			A	A	T	T	C	C	C	A	G	A	C	C	T	T	C	T	G	G	G	G
control 525			C	C	T	T	C	T	C	A	A	A	C	C	T	C	C	C	G	G	G	G
control 526			C	C	T	T	C	T	C	A	G	A	C	C	C	C	C	T	T	G	G	G
control 527			A	C	T	T	C	C	0	0	G	A	C	C	T	C	C	C	T	G	G	G
control 528			A	C	T	T	C	C	C	C	G	A	C	C	T	C	C	T	T	T	G	G
control 529			A	C	T	C	C	T	C	C	G	G	C	C	C	C	C	C	T	G	G	G
control 530			A	A	T	T	C	T	C	C	A	A	C	C	T	C	C	T	T	G	G	G
control 531			A	C	T	C	C	C	C	A	G	G	C	C	T	C	C	C	T	T	G	G
control 532			A	C	T	C	C	C	C	C	0	0	C	C	T	C	C	C	T	T	G	G
control 533			A	A	T	T	C	T	C	A	A	A	C	C	T	C	C	T	T	G	G	G
control 534			0	0	T	C	C	T	0	0	G	A	C	C	C	C	C	C	T	T	G	G
control 535			A	A	T	C	C	C	0	0	G	A	C	C	T	T	C	T	T	G	G	G
control 536			A	A	T	T	C	C	C	A	G	G	C	C	T	T	C	T	G	G	G	A
control 537			A	C	T	C	T	T	C	A	G	G	C	C	T	C	C	T	T	G	G	G
control 538			A	C	T	C	C	C	C	C	G	G	C	C	T	C	C	C	T	G	G	G
control 539			A	C	T	C	C	C	A	A	G	A	C	C	T	C	C	T	T	G	G	G
control 540			A	A	T	T	C	C	C	C	G	G	C	C	T	T	C	T	0	0	G	G
control 541			A	C	T	C	T	T	C	C	G	A	C	C	T	C	C	T	T	G	G	G
control 542			A	C	T	C	C	T	0	0	G	A	C	C	T	C	C	T	T	G	G	G
control 543			C	C	T	T	C	C	0	0	G	A	C	C	T	C	C	C	T	G	G	G
control 544			A	C	T	T	C	C	C	C	G	A	C	C	T	C	C	C	T	T	G	G
control 545			A	C	T	T	C	C	C	A	G	G	C	C	T	C	C	C	T	T	G	G
control 546			A	C	T	C	C	C	C	C	G	A	C	C	T	C	C	T	T	T	G	G
control 547			0	0	C	C	C	C	C	A	G	A	C	C	T	C	C	T	T	G	G	G
control 548			A	A	T	T	C	C	C	C	A	A	C	C	T	C	C	T	G	G	G	G
control 549			A	C	T	T	T	T	C	A	G	A	C	C	T	T	C	T	T	G	G	G
control 550			A	C	T	C	C	C	C	C	G	G	C	C	T	C	C	T	T	G	G	A
control 551			A	C	C	C	C	C	C	A	G	A	C	C	C	C	C	C	T	T	G	G
control 552			A	A	T	C	C	T	C	A	G	A	C	C	T	C	C	T	T	T	G	G
control 553			A	A	C	C	C	C	0	0	A	A	C	C	T	C	T	T	T	T	G	G
control 554			A	C	T	T	C	T	C	A	G	G	C	C	C	C	C	T	T	G	G	A
control 555			A	C	T	C	C	C	C	A	G	G	C	C	T	C	C	T	T	G	G	G
control 556			A	C	T	C	C	C	C	C	G	A	C	C	C	C	C	C	T	G	G	G
control 557			A	C	T	C	T	T	A	A	G	A	C	C	T	T	C	C	T	G	G	G
control 558			A	A	T	C	C	C	C	A	G	A	C	C	T	C	T	T	T	G	G	A
control 559			A	A	T	C	C	C	0	0	G	G	C	C	C	C	T	T	G	G	G	G
control 560			A	A	T	T	C	T	C	C	A	A	C	C	T	T	C	T	T	G	G	G
control 561			A	C	T	C	C	C	0	0	G	A	C	C	C	C	C	C	T	T	G	G
control 562			A	A	T	C	C	T	0	0	G	A	C	C	T	T	C	C	T	G	G	G
control 563			A	C	T	T	C	C	0	0	0	0	C	C	0	0	C	T	T	T	G	G
control 564			A	C	C	C	C	T	C	C	G	A	C	C	T	T	C	C	G	G	G	G
control 565			C	C	C	C	C	T	C	C	G	A	C	C	C	C	C	C	T	T	G	G
control 566			A	C	T	T	C	C	0	0	G	A	C	C	T	T	C	C	T	T	G	G
control 567			A	A	T	T	C	C	0	0	0	0	C	C	T	C	C	T	T	G	G	G
control 568			A	A	0	0	C	T	0	0	0	0	C	C	T	T	C	T	G	G	G	G
